# Supplementary material
Source: Springer Nature journal article supplement (https://www.springermedizin.de/resource/supplementary/13041_2012_174_MOESM1_ESM.pdf/25657646)
Supplement: MOESM1 [file 25657646]

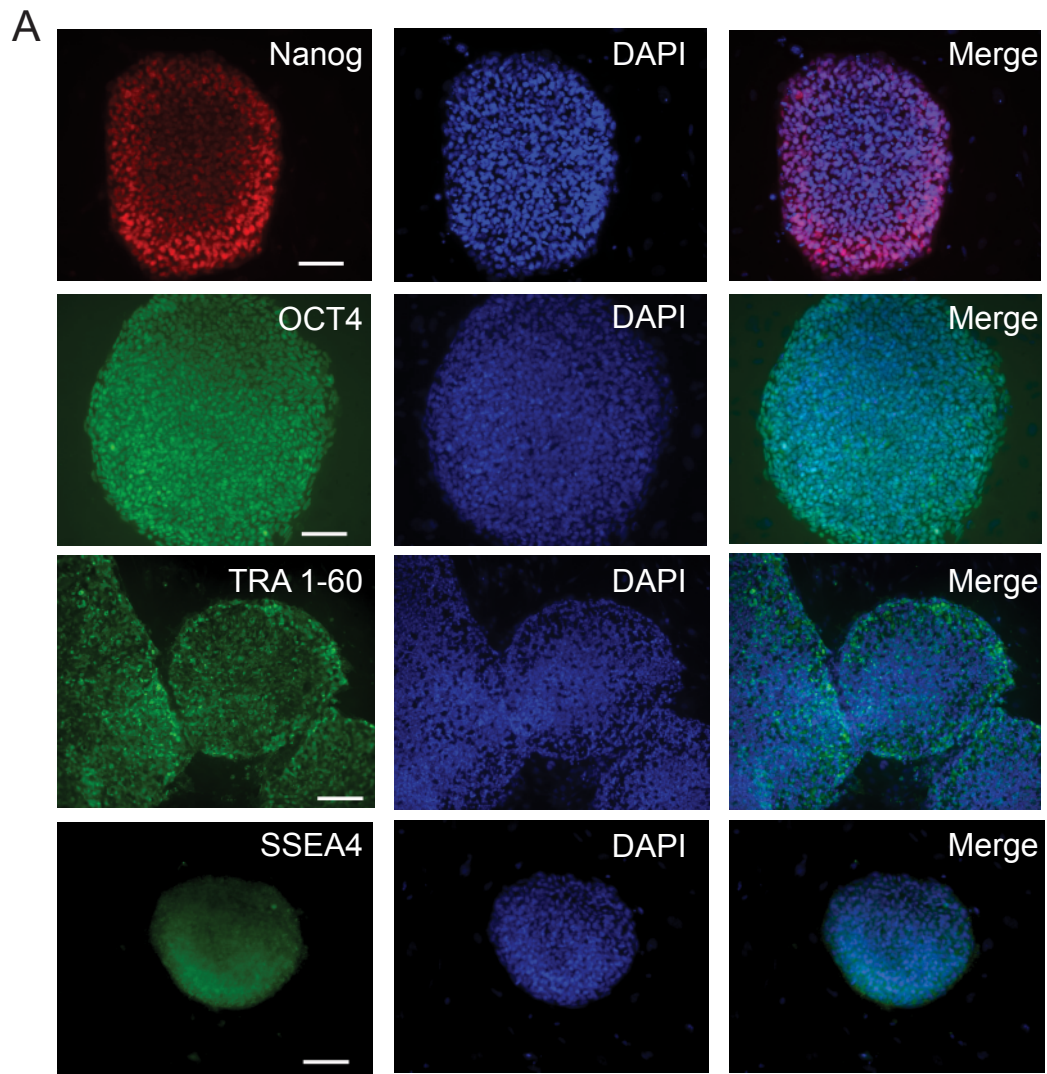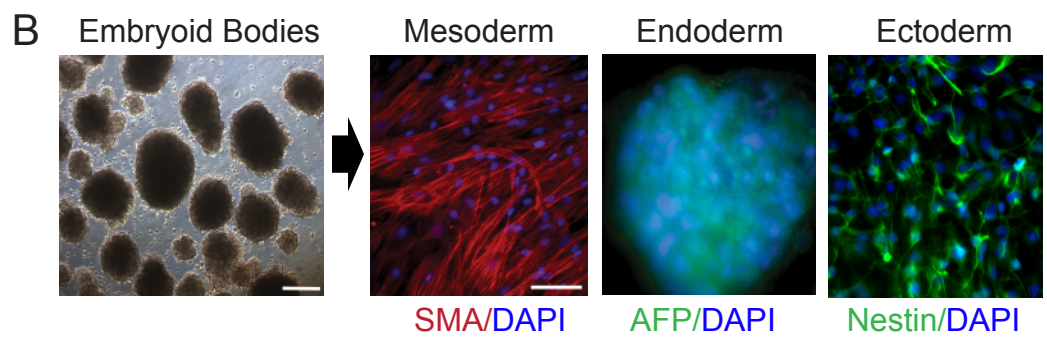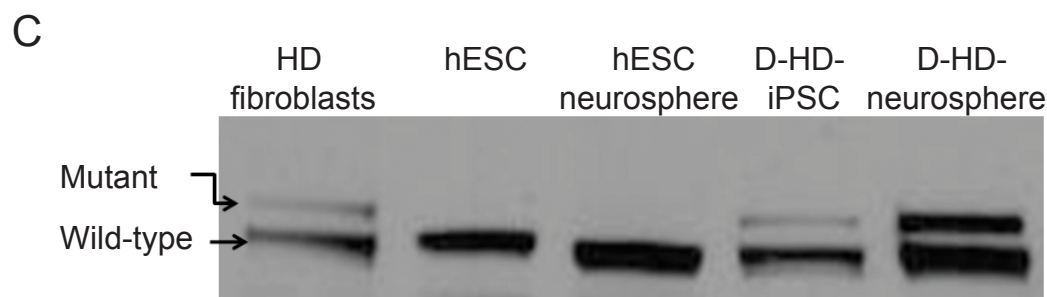

Figure S1 (Juopperi et al.)
